# Supplementary material for: Treatment-related mortality among children with cancer in Denmark during 2001–2021
Source: PubMed Central journal article supplement (PMC11332509; doi:10.2340/1651-226x.2024.27731), 2024-05-07
Supplement: AO-63-27731-s1.pdf [file AO-63-27731-s1.pdf]

Supplementary material has been published as submitted. It has not been copyedited, or typeset by Acta Oncologica

**Supplementary Table 1.** Cancer groups according to International Classification of Childhood Cancer, Third Edition (ICCC-3)

|                                                                                 |     |
|---------------------------------------------------------------------------------|-----|
| Haematological cancers                                                          | n   |
| I. Leukaemias, myeloproliferative and myelodysplastic diseases                  | 984 |
| II. Lymphomas and reticuloendothelial neoplasms                                 | 311 |
| Solid tumours                                                                   | n   |
| IV. Neuroblastoma and other peripheral nervous cell tumours                     | 166 |
| V. Retinoblastoma                                                               | 96  |
| VI. Renal tumours                                                               | 146 |
| VII. Hepatic tumours                                                            | 48  |
| VIII. Malignant Bone tumours                                                    | 153 |
| IX. Soft tissue and other extraosseous sarcomas                                 | 186 |
| Xb-e. Germ cell tumours, trophoblastic tumours and neoplasms of gonads          | 176 |
| XI. Other malignant epithelial neoplasms and malignant melanomas                | 103 |
| XII. Other and unspecified malignant neoplasms <sup>a</sup>                     | 18  |
| CNS tumours                                                                     | n   |
| III. CNS and miscellaneous intracranial and intraspinal neoplasms               | 855 |
| Xa. Germ cell tumours, trophoblastic tumours and neoplasms of gonads            | 9   |
| XII. Other and unspecified malignant neoplasms <sup>a</sup>                     | 2   |
| <sup>a</sup> Tumour type registered, but specific ICC3 diagnosis not available. |     |

**Supplementary Table 2.** 5-year cumulative incidence and relative risk (hazard ratios) of all-cause mortality according to patient characteristics among children diagnosed with cancer during 2001–2021.

|                                | Events n | Person years | 5-year Cumulative incidence (%) <sup>a</sup> | p <sup>b</sup> | Crude                |                | Adjusted             |                |
|--------------------------------|----------|--------------|----------------------------------------------|----------------|----------------------|----------------|----------------------|----------------|
|                                |          |              |                                              |                | Hazard ratio (95%CI) | p <sup>c</sup> | Hazard ratio (95%CI) | p <sup>c</sup> |
| Diagnostic period <sup>d</sup> |          |              |                                              | <0.01          |                      | <0.01          |                      | <0.01          |
| 2001-2010                      | 264      | 7038         | 16.0 (15.0, 18.0)                            |                | Reference            |                | Reference            |                |
| 2011-2021                      | 195      | 6636         | 12.0 (11.0, 14.0)                            |                | 0.73 (0.61, 0.88)    |                | 0.73 (0.61, 0.88)    |                |
| Linear trend per year          |          |              |                                              |                | 0.97 (0.95, 0.98)    | <0.01          | 0.97 (0.95, 0.98)    | <0.01          |
| Sex <sup>e</sup>               |          |              |                                              | 0.40           |                      | 0.40           |                      | 0.40           |
| Female                         | 222      | 6358         | 15.0 (13.0, 17.0)                            |                | Reference            |                | Reference            |                |
| Male                           | 237      | 7316         | 14.0 (12.0, 16.0)                            |                | 0.93 (0.77, 1.12)    |                | 0.93 (0.77, 1.12)    |                |
| Age groups <sup>f</sup>        |          |              |                                              | 0.80           |                      | 0.80           |                      | 0.80           |
| Below 1 year                   | 57       | 1530         | 15.0 (12.0, 19.0)                            |                | 1.15 (0.86, 1.55)    |                | 1.18 (0.87, 1.58)    |                |
| 1-5 years                      | 184      | 5695         | 14.0 (12.0, 16.0)                            |                | Reference            |                | Reference            |                |
| 6-10 years                     | 112      | 3357         | 14.0 (12.0, 17.0)                            |                | 1.03 (0.82, 1.31)    |                | 1.04 (0.82, 1.31)    |                |
| 11-15 years                    | 106      | 3092         | 15.0 (12.0, 18.0)                            |                | 1.06 (0.83, 1.34)    |                | 1.05 (0.83, 1.34)    |                |
| Diagnosis <sup>g</sup>         |          |              |                                              | <0.01          |                      | <0.01          |                      | <0.01          |
| CNS tumour                     | 165      | 3434         | 19.0 (17.0, 22.0)                            |                | Reference            |                | Reference            |                |
| Haematological cancer          | 140      | 5622         | 11.0 (9.4, 13.0)                             |                | 0.53 (0.43, 0.67)    |                | 0.53 (0.42, 0.66)    |                |
| Solid tumour                   | 154      | 4618         | 15.0 (13.0, 17.0)                            |                | 0.70 (0.57, 0.88)    |                | 0.70 (0.56, 0.87)    |                |
| Relapse <sup>h</sup>           |          |              |                                              | <0.01          |                      | <0.01          |                      | <0.01          |
| No                             | 177      | 12469        | 6.8 (5.8, 7.8)                               |                | Reference            |                | Reference            |                |

|                                   |     |       |                   |       |                   |       |                   |       |
|-----------------------------------|-----|-------|-------------------|-------|-------------------|-------|-------------------|-------|
| Yes                               | 282 | 1205  | 47.0 (43.0, 51.0) |       | 35.2 (28.3, 43.8) |       | 36.2 (28.9, 45.3) |       |
| Stem cell transplant <sup>i</sup> |     |       |                   | <0.01 |                   | <0.01 |                   | <0.01 |
| No                                | 388 | 12855 | 13.0 (12.0, 14.0) |       | Reference         |       | Reference         |       |
| Yes                               | 71  | 819   | 28.0 (22.0, 33.0) |       | 3.80 (2.93, 4.93) |       | 2.24 (1.71, 2.94) |       |

All analyses were implicitly adjusted for time since diagnosis (underlying timescale).

<sup>a</sup> 5-year cumulative incidence (%) with 95% confidence intervals; <sup>b</sup> Gray's test; <sup>c</sup> Likelihood ratio test

<sup>d</sup> Adjusted for age at diagnosis and sex; <sup>e</sup> Adjusted for year of diagnosis and age at diagnosis; <sup>f</sup> Adjusted for year of diagnosis and sex; <sup>g</sup> Adjusted for year of diagnosis, age at diagnosis and sex; <sup>h</sup> Adjusted for year of diagnosis, age at diagnosis, sex and stem cell transplant (time-dependent); <sup>h</sup> Adjusted for year of diagnosis, age at diagnosis, sex and stem cell transplant (time-dependent); <sup>i</sup> Adjusted for year of diagnosis, age at diagnosis, sex, and relapse (time-dependent).
